# Supplementary figures and images for: Prevalence of occult nodal metastases in squamous cell carcinoma of the temporal bone: a systematic review and meta-analysis
Source: Springer Nature journal article supplement (doi:10.1007/s00405-022-07399-3), 2022-05-13

## A. Funnel plot

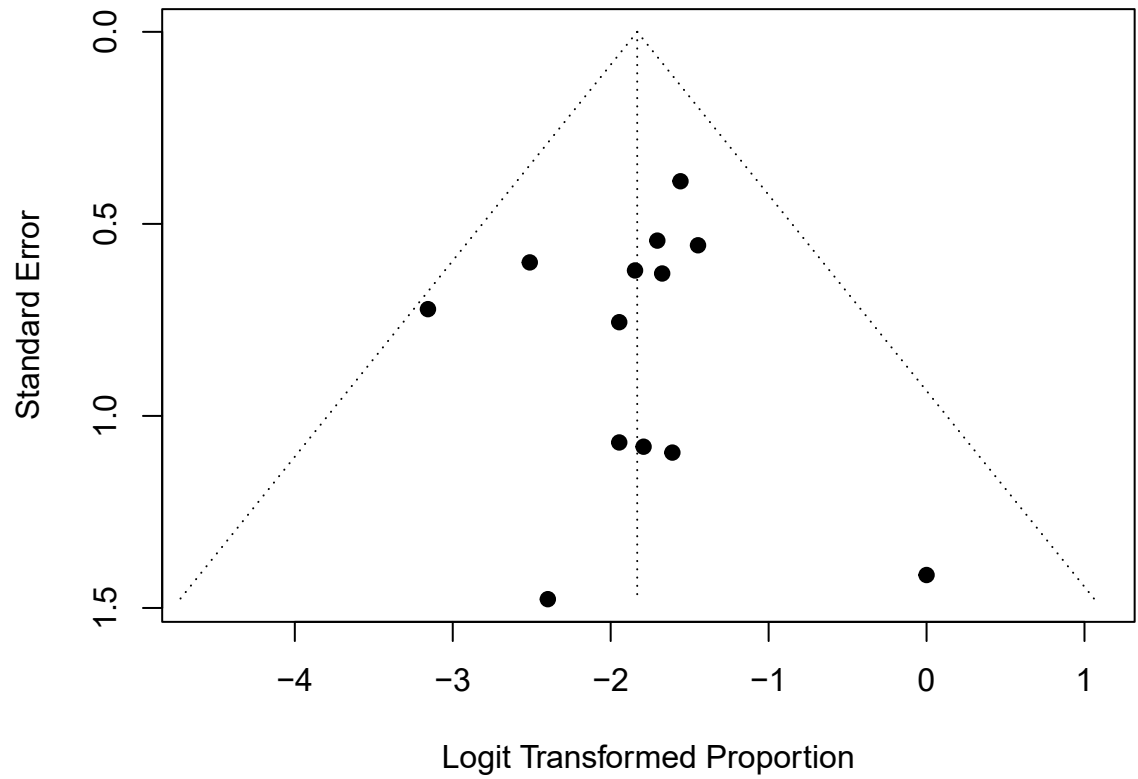

## B. Sensitivity analysis

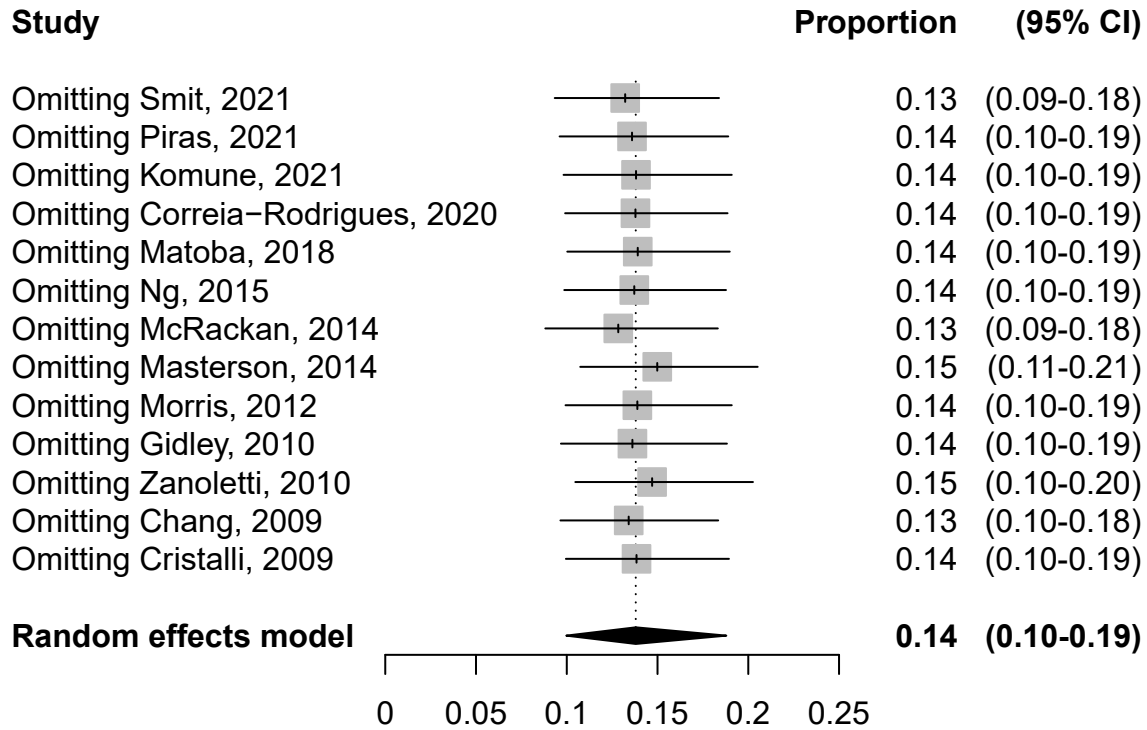

Supplement: MOESM1 [file 405_2022_7399_MOESM1_ESM.pdf]
